# Supplementary material
Source: MDPI journal article supplement (https://www.mdpi.com/2071-1050/10/3/759)
Supplement: s1 [file s1]

## Appendix A

### Semi-structured interviews

Date:

**Thank you for your participation in the interview.**

**The interview is anonymous and its results will be used only for scientific purposes.**

#### Part-I: Personal data

(Please tick and write about yourself)

1. Sex : Male ☐ Female ☐

2. Age :

3. Education (Please tick)

|                                                 |                          |
|-------------------------------------------------|--------------------------|
| Informally educated                             | <input type="checkbox"/> |
| Primary                                         | <input type="checkbox"/> |
| Secondary                                       | <input type="checkbox"/> |
| Vocational agricultural                         | <input type="checkbox"/> |
| Secondary agricultural                          | <input type="checkbox"/> |
| Higher secondary agricultural (up to 12 grades) | <input type="checkbox"/> |

4. Agriculture is my only source of income-

YES ☐ NO ☐

So, your monthly income in BDT

5. Your family members

6. My income is enough to bear the expenses of my family

YES ☐ NO ☐

7. If it is not enough how you manage the family expenses-

## **Part 2: Farmers' Knowledge about Environmental Sustainability**

(Please tick according to your opinion)

8. I have already known the concept of environmental sustainability-

YES ☐ NO ☐

9. I am conscious about agro environment

YES ☐ NO ☐

How?

10. I have adopted training on fertilizer application (or on agriculture)-

YES ☐ NO ☐

If no, how have you been familiar with fertilization?

11. I have learned fertilizer use from my nearby senior farmers (traditional broadcasting method)-

YES ☐ NO ☐

12. Do you apply an excessive amount of fertilizers for gaining high yield?

YES ☐ NO ☐

## **Part 3: Farming Capitals** (Please tick according to your opinion)

13. I have no own farmlands-

YES ☐ NO ☐

If no, do you cultivate others' land (rental land)?

YES ☐ NO ☐

14. I usually apply the excessive amount of fertilizers in rental lands-

YES ☐ NO ☐

15. I use nitrogen fertilizer (N) excessively-

YES ☐ NO ☐

Why?

16. Nitrogen fertilizer is easy to collect and inexpensive-

YES ☐ NO ☐

**Part 4: Fertilizer governance** (Please tick mark)

17. Field agriculture/fertilizer administration visit regularly farmers/farming areas  
(cooperative or non-cooperative)

YES ☐ NO ☐

If yes, officers provide important guidance us on sustainable fertilization-

18. I have been able to test my land soil by government soil testing center-

YES ☐ NO ☐

If no, why?

**THANK YOU**

*The questionnaire is anonymous but if you give your consent to contact you in case any additional questions arise please leave your phone number or e-mail.*

*Moreover, in case of questions please contact us at: [atik73@i.shu.edu.cn](mailto:atik73@i.shu.edu.cn)*
